# Supplementary material for: The protective role of Bax Inhibitor-1 against chronic mild stress through the inhibition of monoamine oxidase A
Source: PubMed Central journal article supplement — Sci Rep. 2013 Dec 2;3:3398. doi: 10.1038/srep03398 (PMC3844965; doi:10.1038/srep03398), 2013-12-02
Supplement: srep03398-s1.pdf [file srep03398-s1.pdf]

# **The protective role of Bax inhibitor-1 against chronic mild stress through the inhibition of Monoamine oxidase-A**

Hwa-Young Lee<sup>1</sup>, Geum-Hwa Lee<sup>1</sup>, Anu Marahatta<sup>1</sup>, Shun-Mei Lin<sup>1</sup>, Mi-Rin Lee<sup>1</sup>, Kyu Yun Jang<sup>2</sup>, Kyung Min Kim<sup>2</sup>, Hee Jae Lee<sup>3</sup>, Jae-Won Lee<sup>3</sup>, Tarique Rajasaheb Bagalkot<sup>4</sup>, Young-Chul Chung<sup>4</sup>, Yong-Chul Lee<sup>5</sup>, Hyung-Ryong Kim<sup>6</sup>, Han-Jung Chae<sup>1\*</sup>

<sup>1</sup>Department of Pharmacology, Chonbuk National University Medical School, Jeonju, Korea

<sup>2</sup>Department of Pathology, Chonbuk National University Medical School, Jeonju, Korea

<sup>3</sup>Department of Pharmacology, College of Medicine, Kangwon National University, Chuncheon, Korea

<sup>4</sup>Department of Psychiatry, Chonbuk National University Medical School, Jeonju, Korea

<sup>5</sup>Department of Internal Medicine, Chonbuk National University Medical School, Jeonju, Korea

<sup>6</sup>Department of Dental Pharmacology, College of Dentistry, Wonkwang University, Iksan, Korea

Address correspondence to: \*Han-Jung Chae, PhD, Department of Pharmacology & Institute of Cardiovascular Research, Medical School, Chonbuk Univ. Jeonju, Chonbuk, Tel: 82-63-270-3092, Fax: 82-63-275-2855; E-mail: [hjchae@chonbuk.ac.kr](mailto:hjchae@chonbuk.ac.kr) \*Hyung-Ryong Kim, PhD, Department of Dental Pharmacology, College of Dentistry, Wonkwang Univ. Iksan, Chonbuk, Tel: 82-63-850-6640; E-mail: [hrkimdp@wonkwang.ac.kr](mailto:hrkimdp@wonkwang.ac.kr)

## **Supplementary Information**

### **Forced Swimming Test**

Each animal was placed in a beaker (18 cm diameter, 24 cm depth) filled with water (temperature 25-26°C) to a height of 16 cm. Immobility (floating with only small movements to keep balance) and swimming were scored throughout the last 4 minutes of the 6-minute test period. A trained observer who was blind to the treatment paradigm conducted the scoring.

### **Determination of target mRNA by semi-quantitative reverse transcriptase-PCR (RT-PCR)**

Total RNA from treated mouse brain tissue was prepared with TRIZOL reagent according to the manufacturer's protocol and digested with RNase-free DNase to clear residual genomic DNA. First strand cDNA was reverse-transcribed from 1 µg of total RNA using oligo-(dT) (SuperScript<sup>TM</sup>III First-Strand Synthesis System, Invitrogen). The sequences of the primers used for RT-PCR were as follows: mouse MAO-A: 5' TCA ATG TAG CCA CTC CAC TGT 3' (forward); 5' TTG GGG ATA AAG TGA AGC TGA 3' (reverse); mouse MAO-B: 5' GTG GTA TGT GAA GCA GTG TGG 3' (forward); 5' TCA GTG CCT GCA AAG AAA ATC 3' (reverse). PCR conditions were as follows: 1 cycle of 94°C for 3 min followed by 35 cycles of 94°C for 30 sec, 54°C for 45 sec, and 72°C for 90 sec with a final cycle of 72°C for 10 min. Ten µL of PCR products were separated on a 1% agarose gel in 1X TAE (40 mM Tris, pH 8.0, 20 mM acetic acid, 1 mM EDTA) buffer and visualized using ethidium bromide staining.

## **Supplementary Figure Legends**

**Supplementary Figure 1. Experimental design for chronic mild stress.**

**Supplementary Figure 2. Body weight of the four experimental groups over the 6 weeks of chronic mild stress. BI-1, Bax inhibitor.**

**Supplementary Figure 3. Effects of chronic mild stress in the forced swimming test.**

Swimming time during the forced swimming test was analyzed in BI-1<sup>+/+</sup> and BI-1<sup>-/-</sup> mice after 2- and 6-weeks of chronic mild stress.

**Supplementary Figure 4. Effects of chronic mild stress on MAO-A and MAO-B RNA and protein expression.** (A) RT-PCR from BI-1<sup>+/+</sup> and BI-1<sup>-/-</sup> mouse brain RNA was performed after 2- and 6-weeks of chronic mild stress. (B) Immunoblots from BI-1<sup>+/+</sup> and BI-1<sup>-/-</sup> mouse brain lysates were performed with anti-MAO-A, -B, and β-actin antibody after 2- and 6-weeks of chronic mild stress. Although cropped blots were used, the gels were run under the same experimental conditions.

**Supplementary Table 1. Spontaneous locomotor activities after 2- and 6-weeks of chronic mild stress.**

**Supplementary Table 2. Analysis of serotonin, norepinephrine, and dopamine.**

# Supplementary Fig. 1

**A**

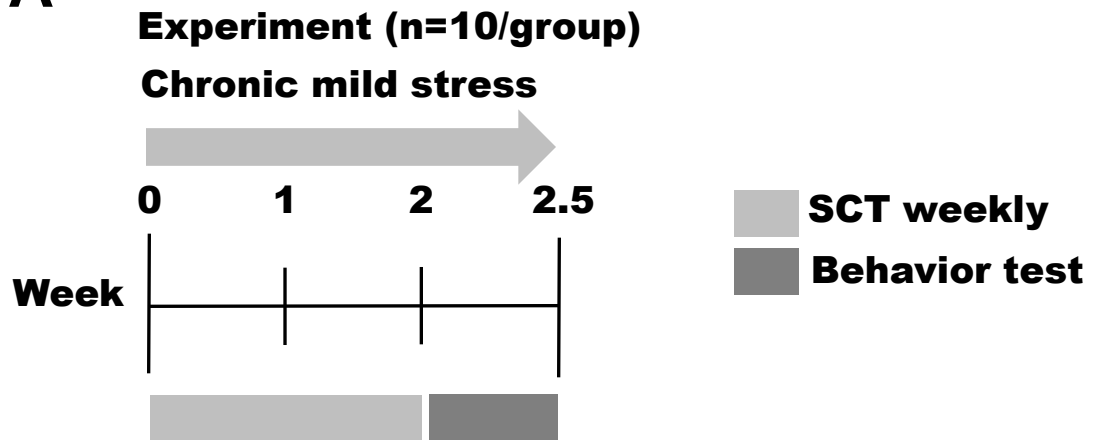

**B**

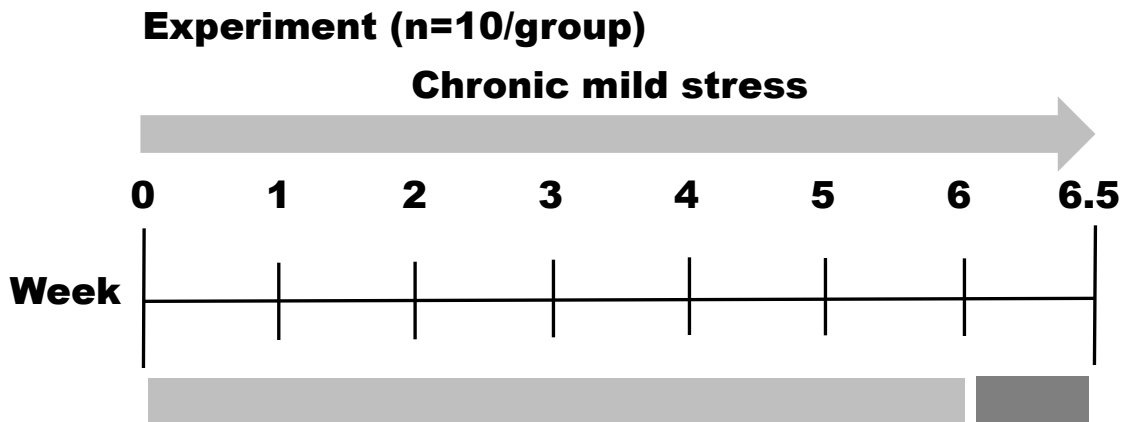

# Supplementary Fig. 2

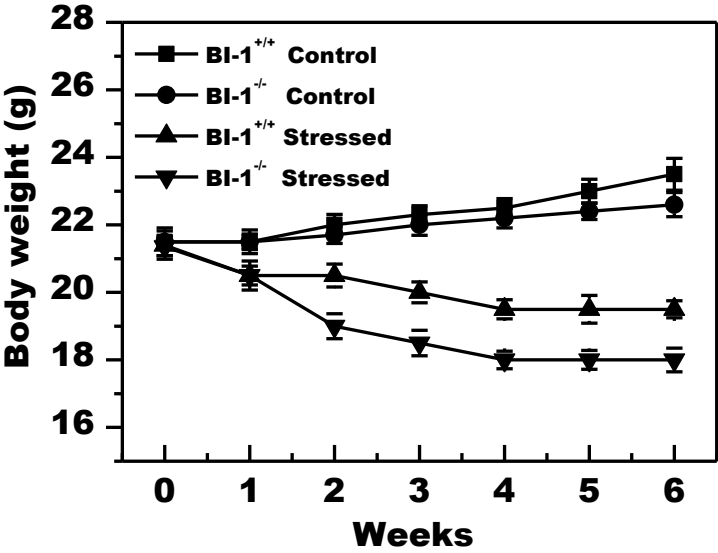

# Supplementary Fig. 3

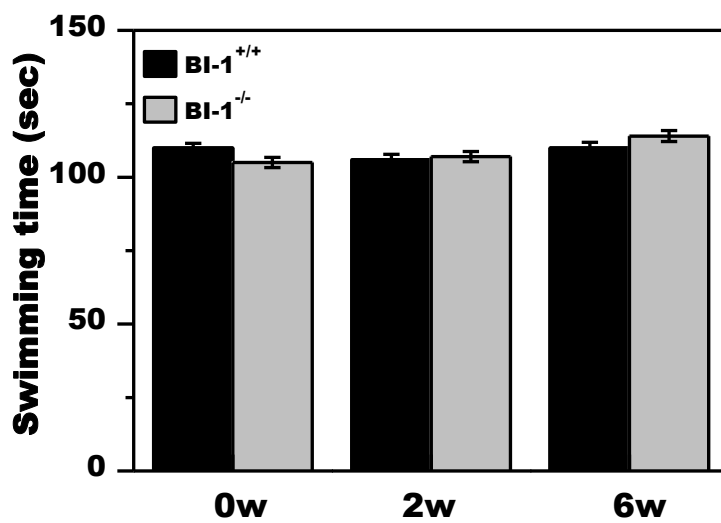

# Supplementary Fig. 4

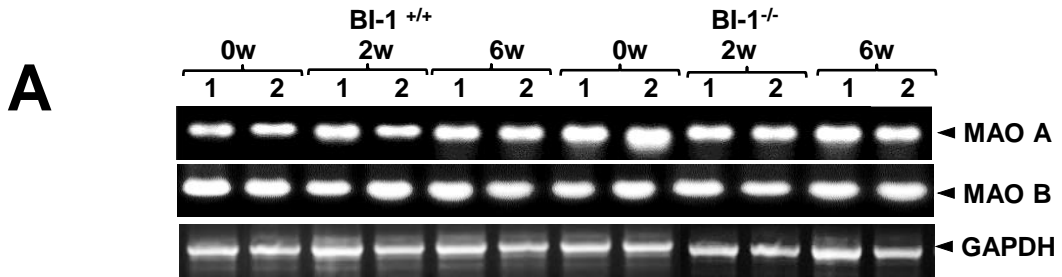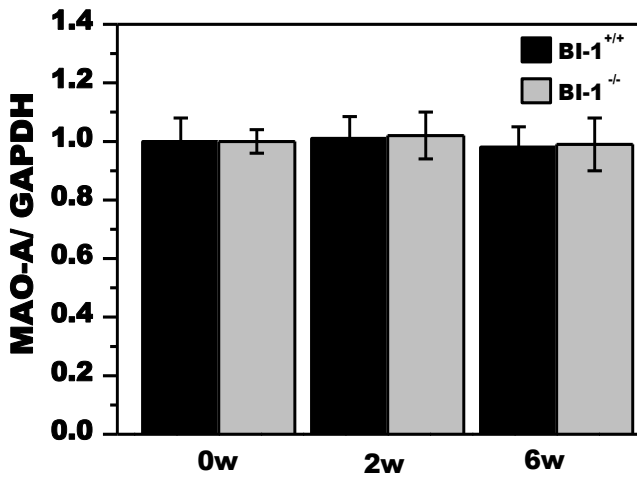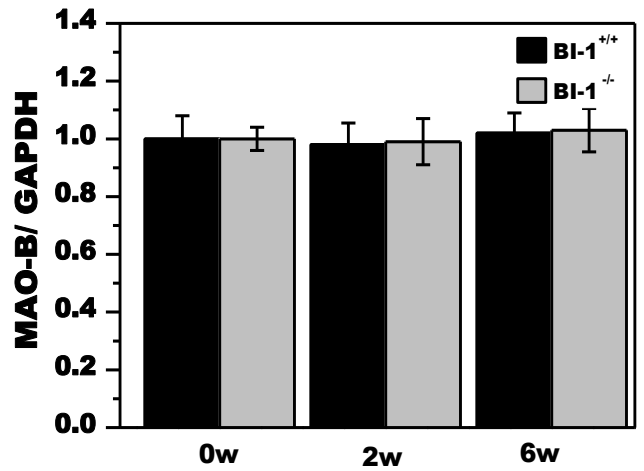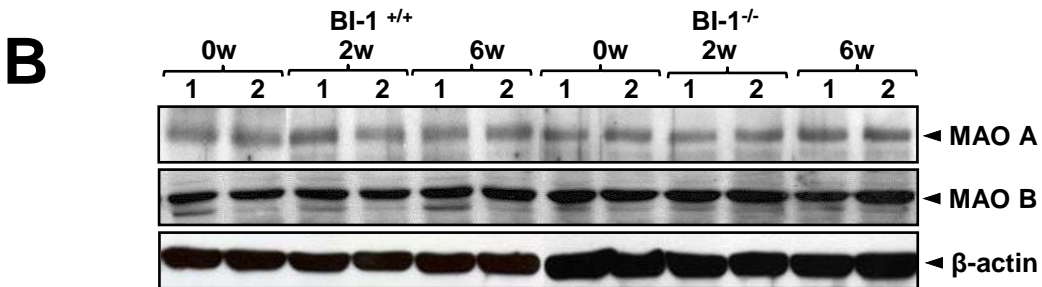

# Supplementary Table. 1

## Spontaneous locomotor activities after 2- and 6-week treatment of chronic mild stress

|        | Group                        | Distance traveled (cm) | Locomotor time (seconds) |
|--------|------------------------------|------------------------|--------------------------|
| 2weeks | BI-1 <sup>+/+</sup> con      | 20802.485 ± 3188.00039 | 1752.23 ± 369.36238      |
|        | BI-1 <sup>-/-</sup> con      | 21203.425 ± 2956.20839 | 1928.2 ± 333.85052       |
|        | BI-1 <sup>+/+</sup> stressed | 26777.88 ± 5580.03368  | 2159.9 ± 250.88011       |
|        | BI-1 <sup>-/-</sup> stressed | 26063.55 ± 4897.95897  | 2381.1 ± 246.21458       |
| 6weeks | BI-1 <sup>+/+</sup> con      | 37613.96 ± 6188.00039  | 2926.8 ± 469.36238       |
|        | BI-1 <sup>-/-</sup> con      | 35426.59 ± 8580.03368  | 2880.8 ± 523.85052       |
|        | BI-1 <sup>+/+</sup> stressed | 49455.35 ± 2956.20839  | 4030.8 ± 486.88011       |
|        | BI-1 <sup>-/-</sup> stressed | 63369.68 ± 4897.95897  | 4846.2 ± 506.21458       |

# Supplementary Table 2

|        | Group                        | Serotonin        | Norepinephrine   | Dopamine       |
|--------|------------------------------|------------------|------------------|----------------|
| 2weeks | BI-1 <sup>+/+</sup> con      | 3055.48 ± 136.32 | 4562.37 ± 95.26  | 5294.31±133.92 |
|        | BI-1 <sup>-/-</sup> con      | 3041.19 ± 100.88 | 4466.64 ± 143.34 | 5030.15±142.91 |
|        | BI-1 <sup>+/+</sup> stressed | 3235.73 ± 199.82 | 4442.6 ± 52.28   | 5374.18±103.01 |
|        | BI-1 <sup>-/-</sup> stressed | 3008.47 ± 102.45 | 4518.48 ± 155.57 | 5105.76±153.55 |
| 6weeks | BI-1 <sup>+/+</sup> con      | 3183.52 ± 120.76 | 4260.54 ± 155.59 | 5298.43±182.58 |
|        | BI-1 <sup>-/-</sup> con      | 3270.71 ± 107.78 | 4325.60 ± 129.75 | 5103.36±161.44 |
|        | BI-1 <sup>+/+</sup> stressed | 3282.94 ± 126.58 | 4614.93 ± 131.52 | 5347.47±144.50 |
|        | BI-1 <sup>-/-</sup> stressed | 2627.56 ± 108.31 | 4053.03 ± 134.13 | 4370.94±129.74 |
